# Supplementary material for: Gemcitabine enhances cell invasion via activating HAb18G/CD147-EGFR-pSTAT3 signaling
Source: PubMed Central journal article supplement (PMC5308719; doi:10.18632/oncotarget.11405), 2016-08-19
Supplement: oncotarget-07-62177-s001.pdf [file oncotarget-07-62177-s001.pdf]

## Gemcitabine enhances cell invasion via activating HAb18G/CD147-EGFR-pSTAT3 signaling

### SUPPLEMENTARY FIGURES

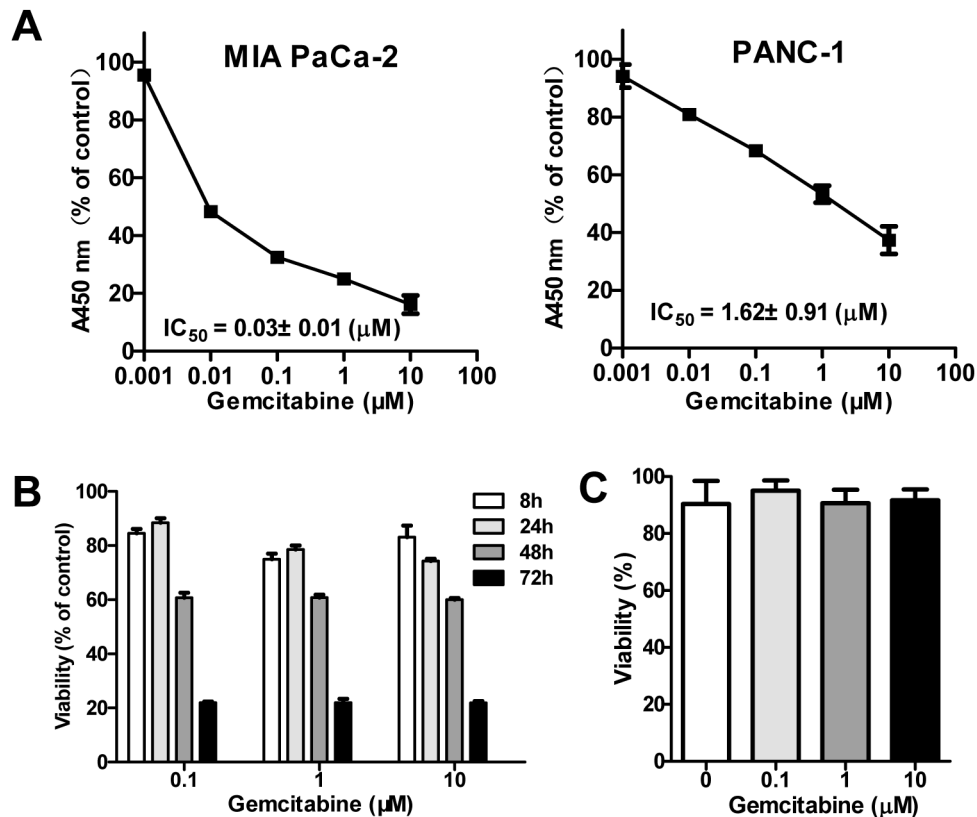

**Supplementary Figure S1: Gemcitabine enhances the migration and invasion of pancreatic cancer cells.** A. Chemosensitivity of MIA PaCa-2 cells and PANC-1 cells to gemcitabine.  $\text{IC}_{50}$  values were calculated at 72 hours by fitting sigmoidal dose-response curve using GraphPad Prism version 5.0. B. Relative cell viability after treatment with various concentrations of gemcitabine (0, 0.1, 1, or 10  $\mu\text{M}$ ) for different time points (8 to 72 hours) was examined by WST-8 assay. MIA PaCa-2 cells treated with PBS were used as control. C. Cell viability measurement by hemocytometer. MIA PaCa-2 cells were treated with gemcitabine for 24 hours at various concentrations (0, 0.1, 1, or 10  $\mu\text{M}$ ) and the cell viability was examined immediately.

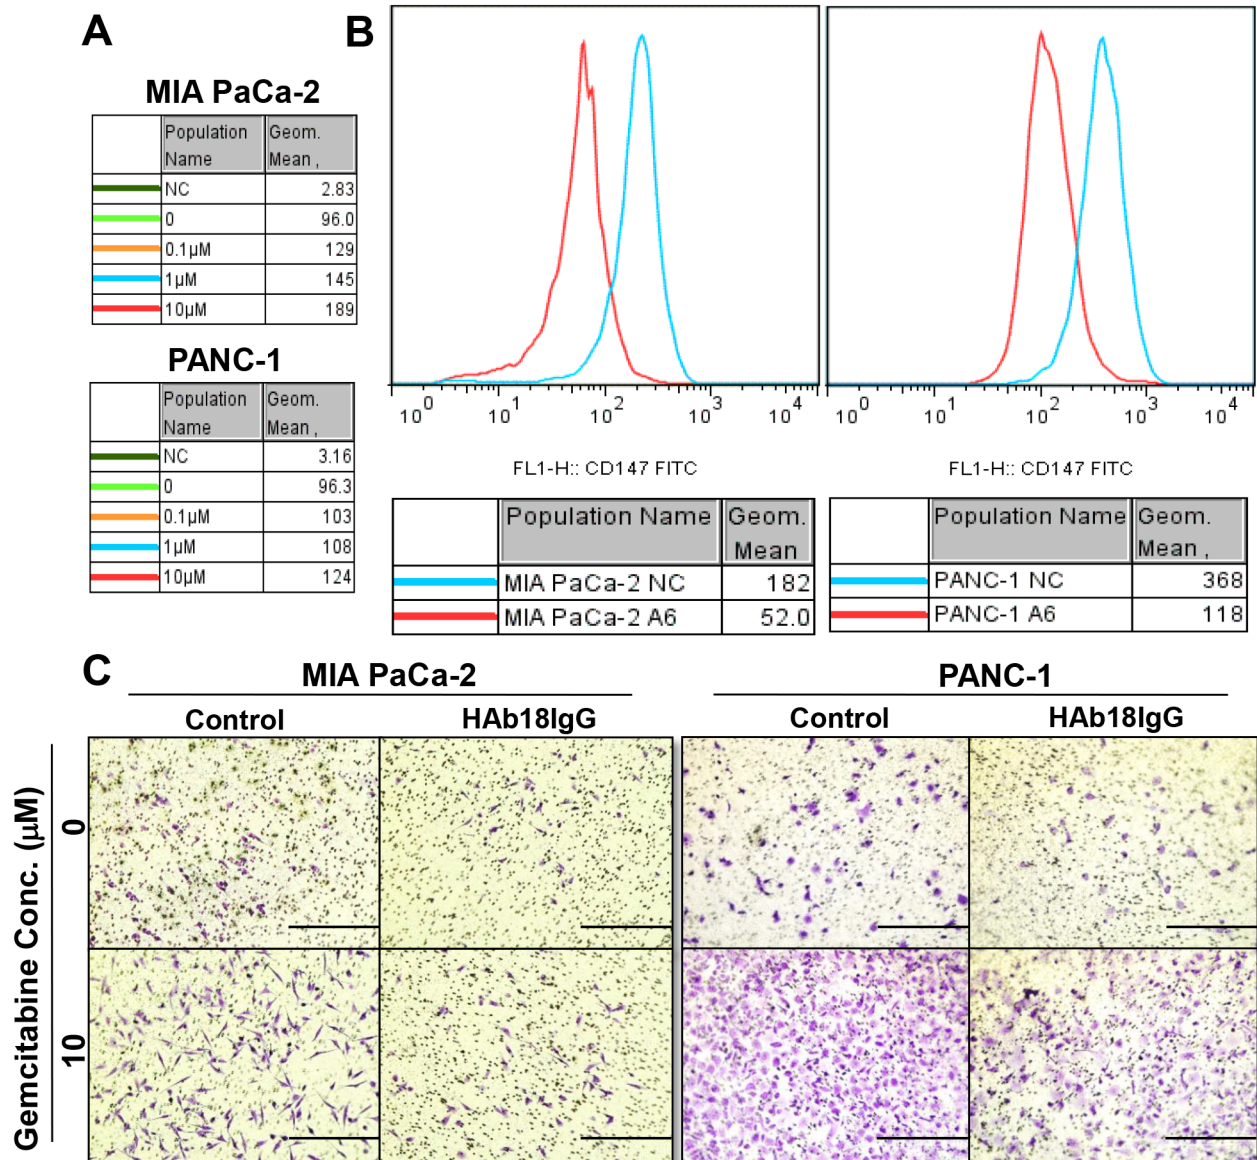

**Supplementary Figure S2: HAb18G/CD147 is required for gemcitabine-enhanced invasion of pancreatic cancer cells.** Cells were labeled with FITC-conjugated anti-human CD147 antibody, and isotype-matched mouse immunoglobulin was used as a control. **A.** Flow cytometry analysis of the HAb18G/CD147 membrane levels in pancreatic cancer cells treated with different doses of gemcitabine (0, 0.1, 1, or 10 μM) for 24 hours. **B.** Flow cytometry analysis of the membrane levels of HAb18G/CD147 in CD147 knock-down cells. NC, non-target shRNA control; A6, CD147 shRNA. **C.** *In vitro* invasion assay of pancreatic cancer cells treated with gemcitabine (10 μM, 24 hours) alone or in combination with 30 μg/ml HAb18IgG. Cells that migrated/invaded to the lower surface of the filter were fixed, stained, imaged, and counted in 10 random view fields. Bars = 500 μm as indicated. \*\**P* < 0.01; \*\*\**P* < 0.001 compared with control.

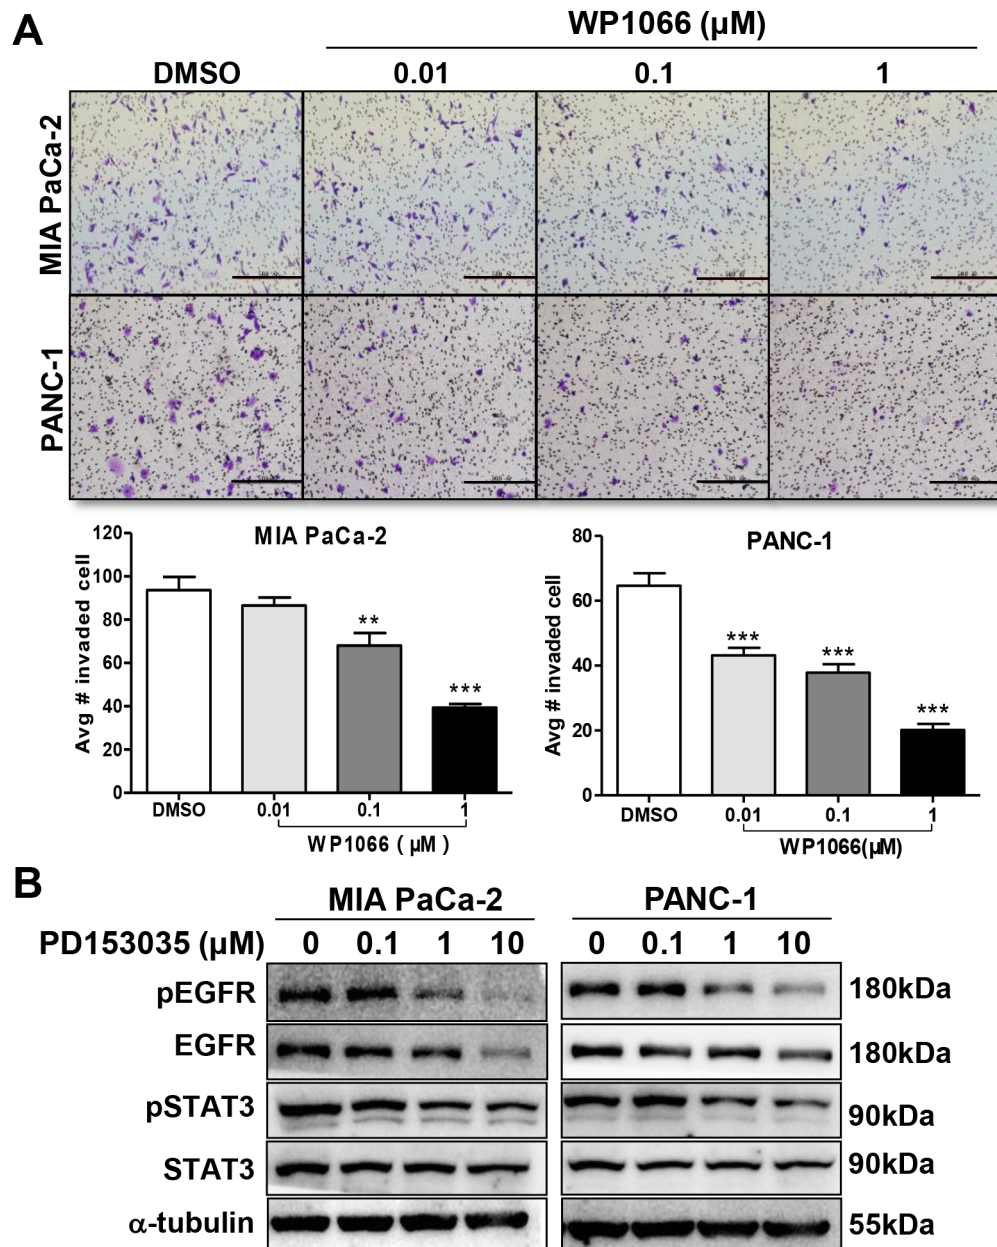

**Supplementary Figure S3: EGFR-STAT3 signaling is involved in gemcitabine-enhanced invasion.** **A.** *In vitro* invasion of pancreatic cancer cells treated with different doses of WP1066 (0, 0.01, 0.1, or 1  $\mu\text{M}$ ) for 24 hours. **B.** Western blot of pSTAT3, STAT3, pEGFR, and EGFR expression in pancreatic cancer cells treated with different doses of PD153035 (0, 0.1, 1, or 10  $\mu\text{M}$ ) for 24 hours.

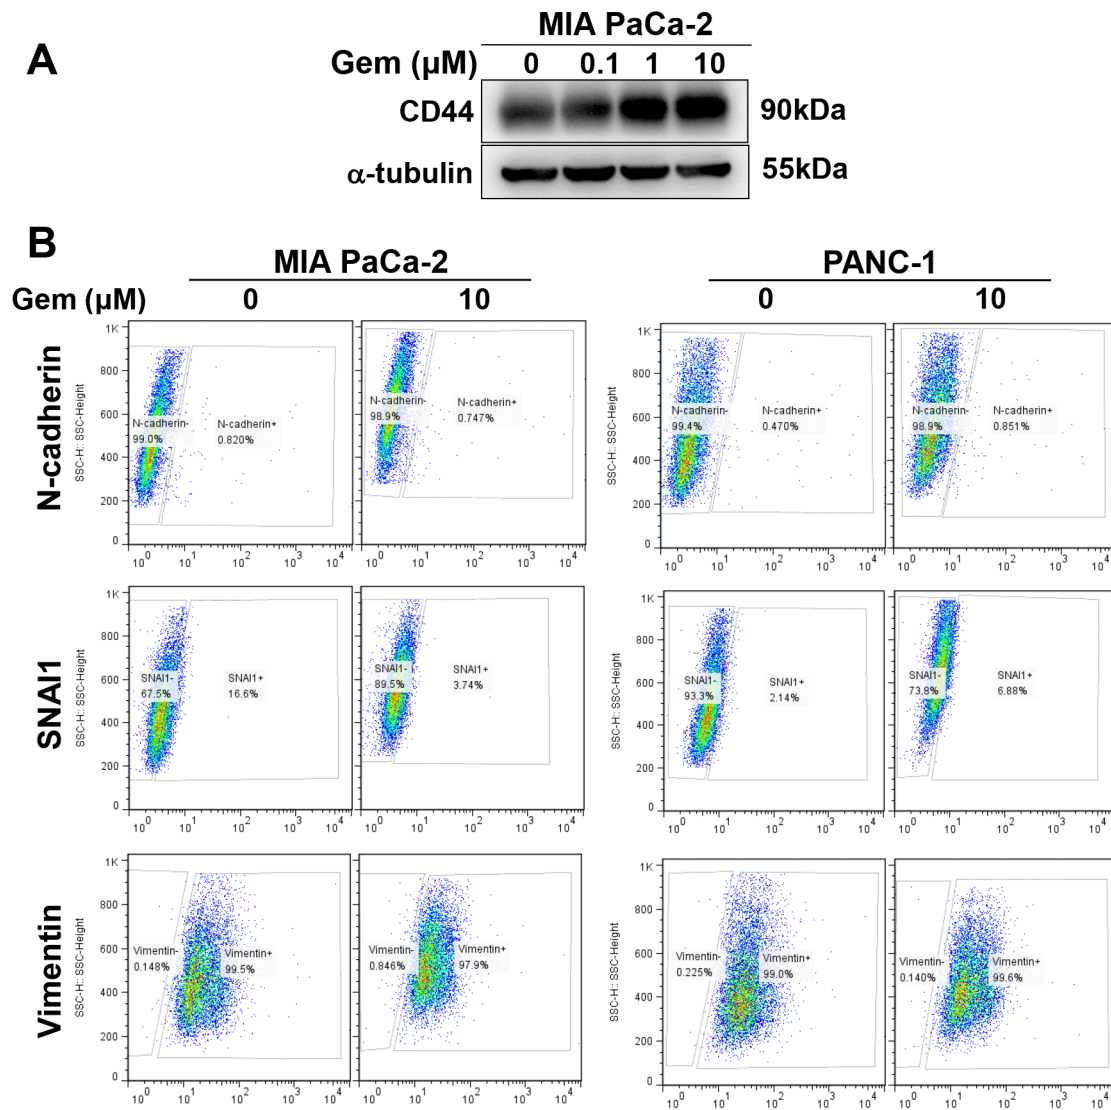

**Supplementary Figure S4: CD44 and EMT markers expression upon gemcitabine treatment.** **A.** Western blot of CD44 expression in pancreatic cancer cells treated with different doses of gemcitabine (0, 0.1, 1, or 10  $\mu\text{M}$ ) for 24 hours. **B.** Flow cytometry analysis of the EMT markers' (N-cadherin, SNAI1 and Vimentin) membrane levels in pancreatic cancer cells treated with gemcitabine (10  $\mu\text{M}$ , 24 hours).
